# Supplementary material for: Epiphytic Microbial Community and Post-Harvest Characteristics of Strawberry Fruits as Affected by Plant Nutritional Regime with Silicon
Source: MDPI journal article supplement (doi:10.3390/agronomy11122407), 2021-11-26
Supplement: s1 [file s1]

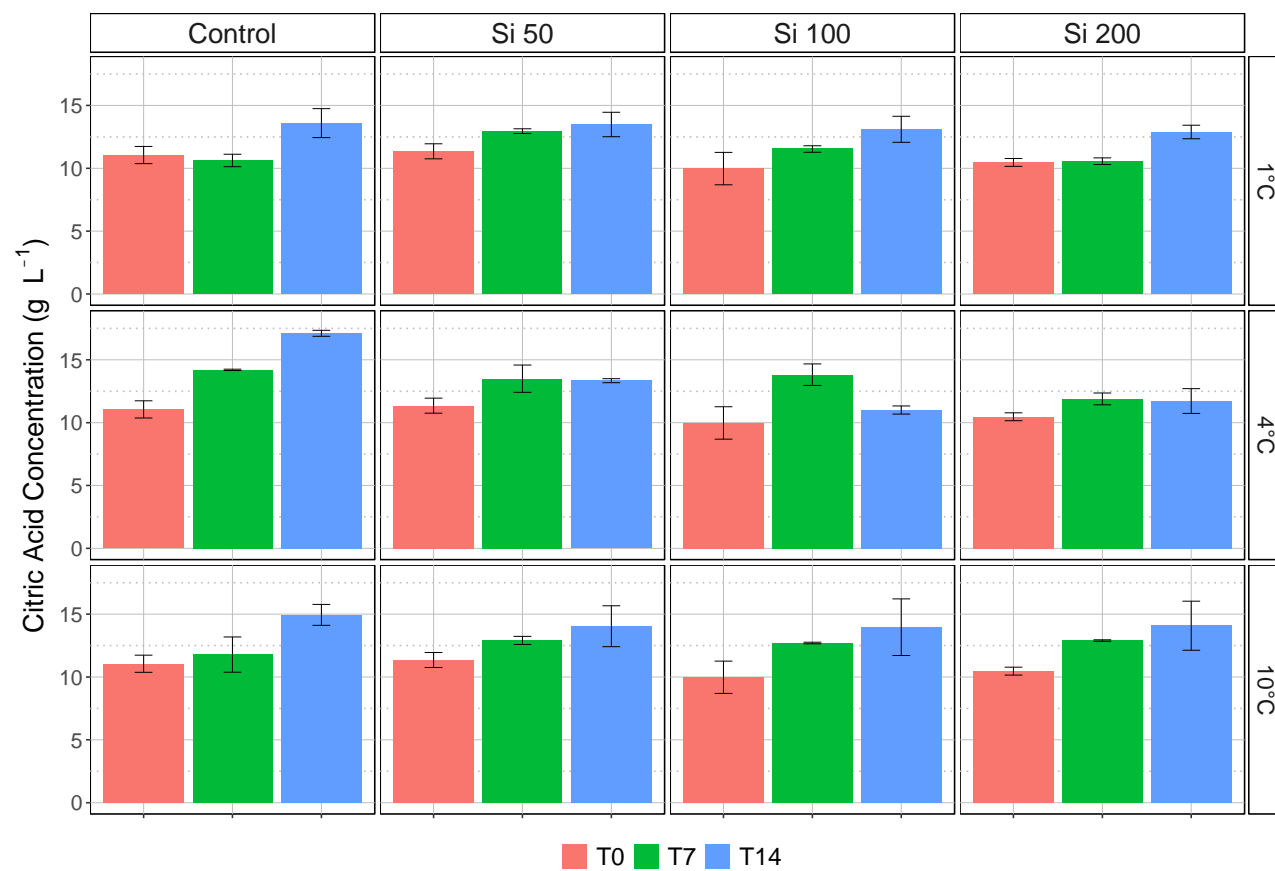

Supplementary Figure S1

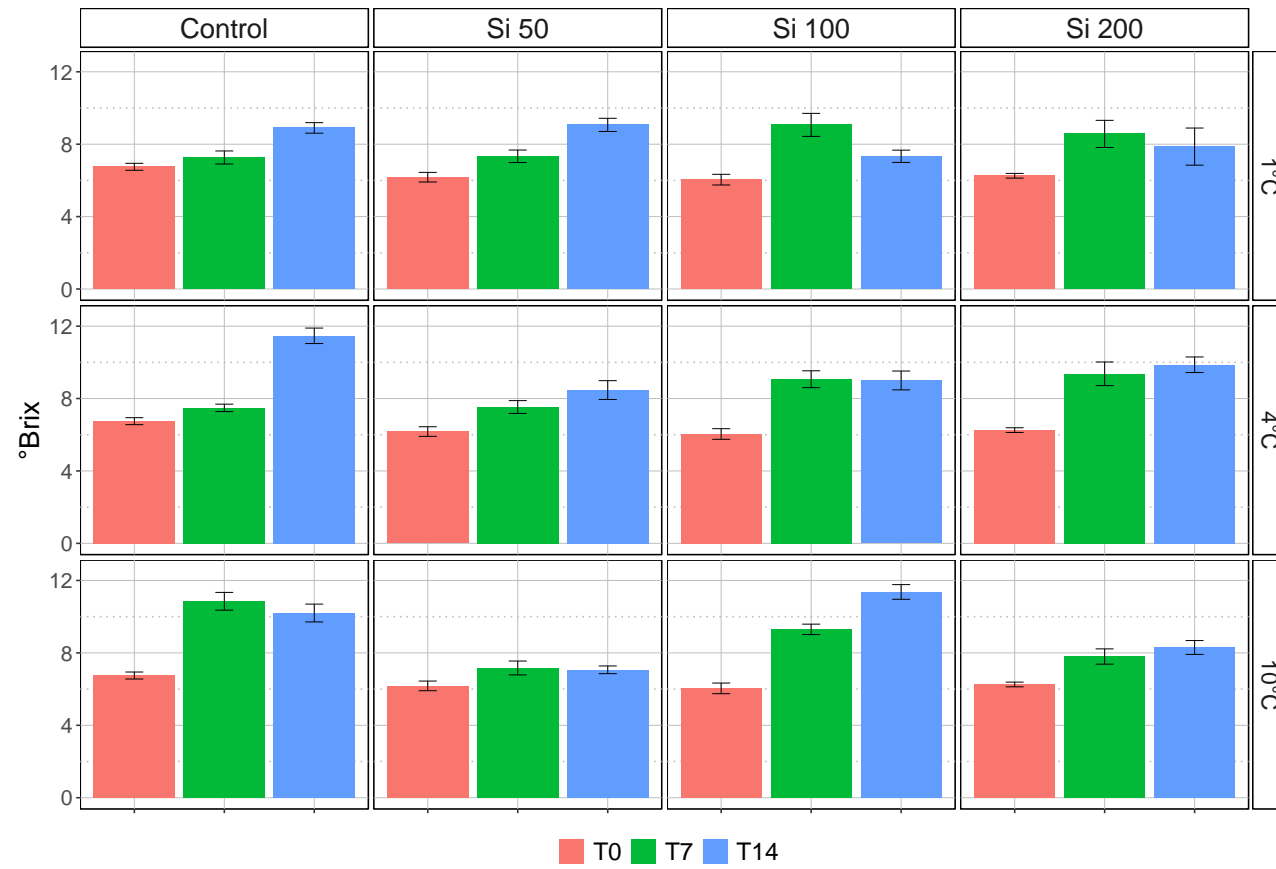

Supplementary Figure S2

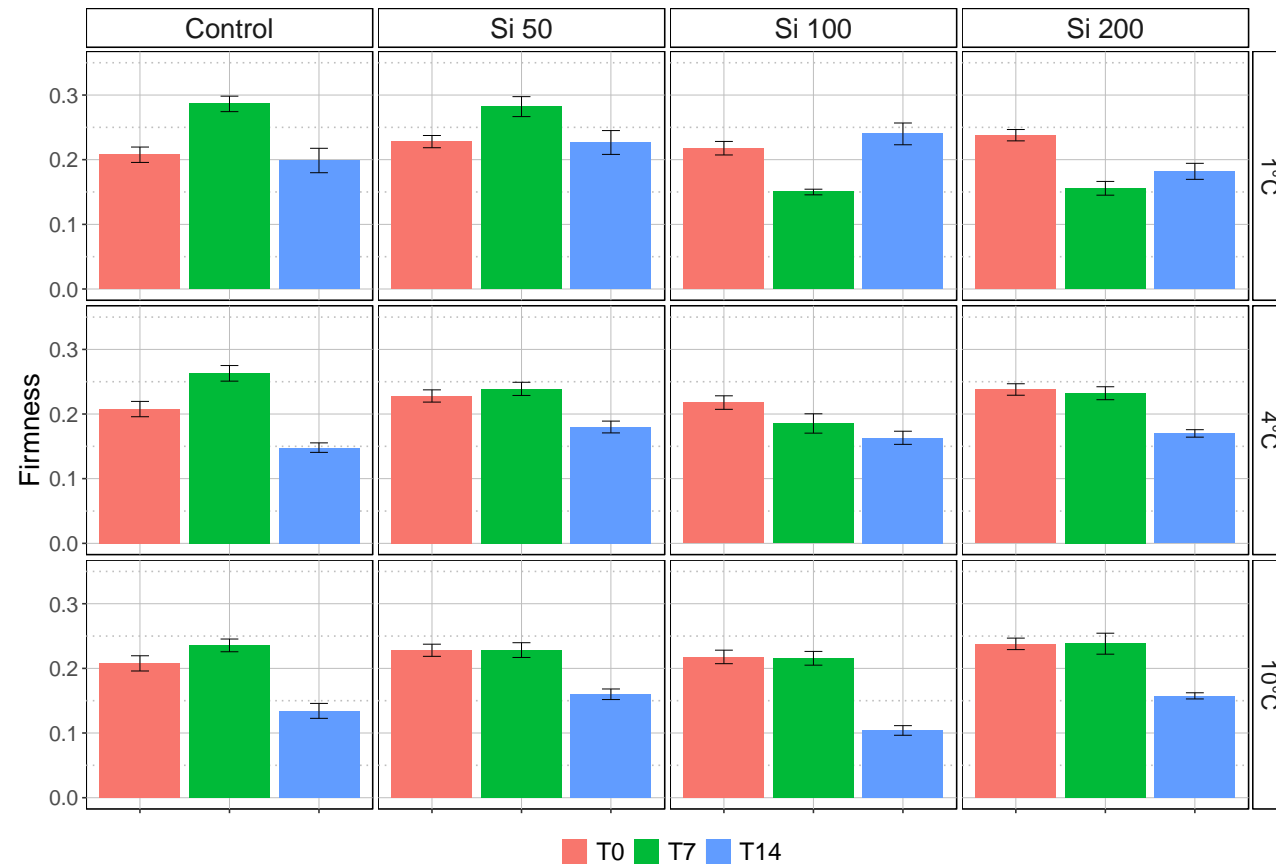

Supplementary Figure S3

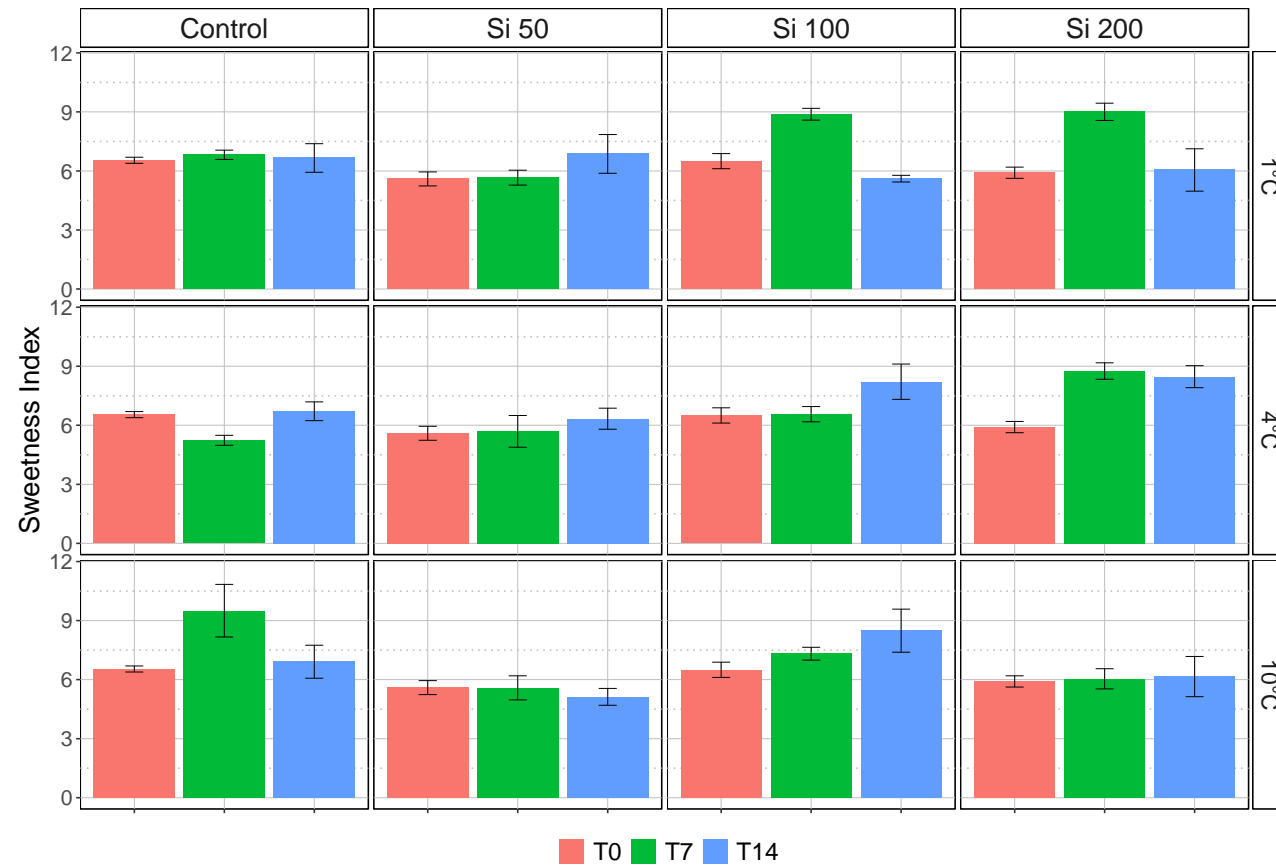

Supplementary Figure S4

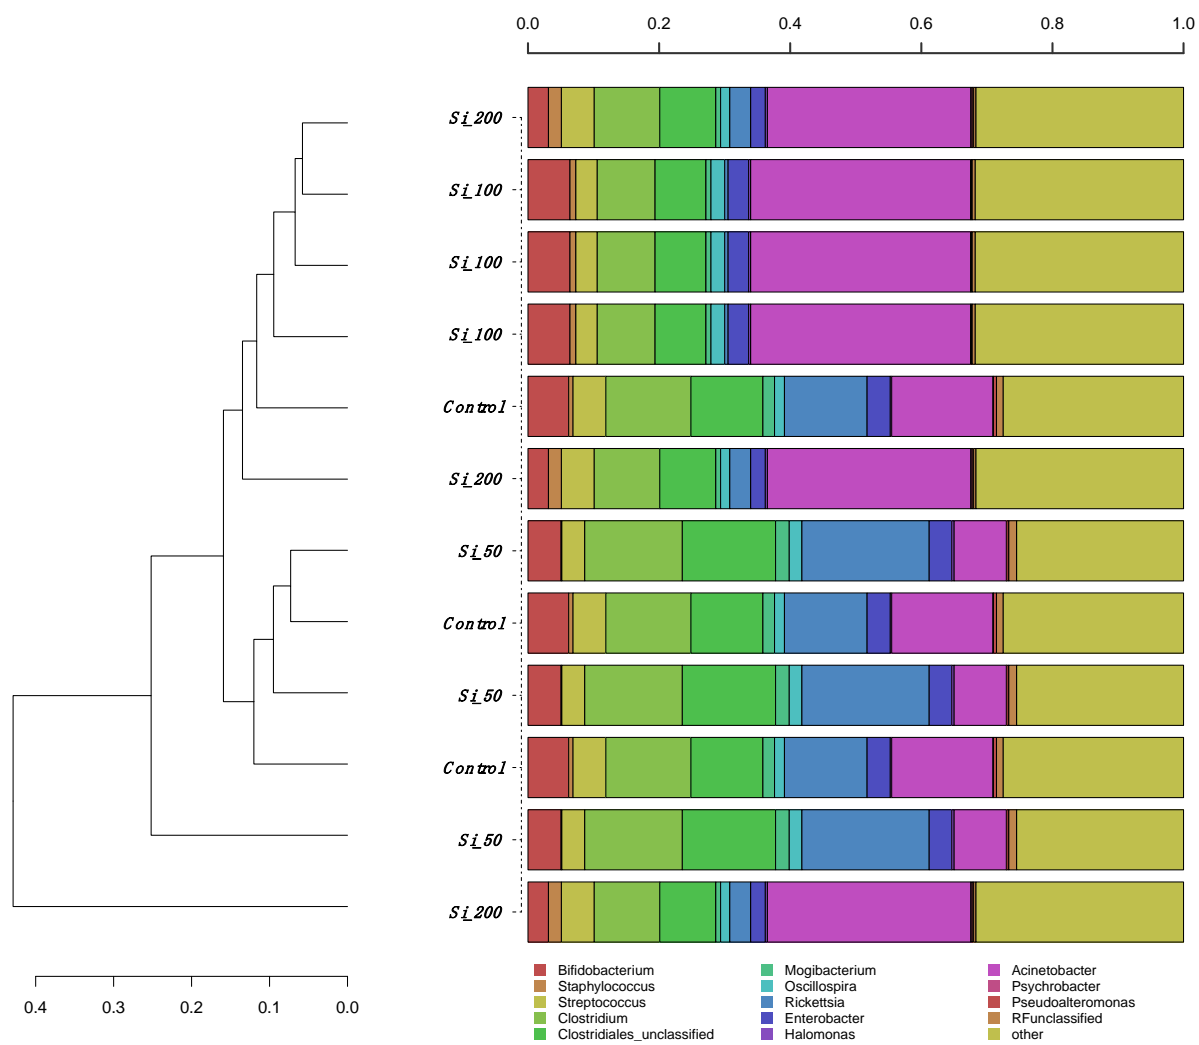

Supplementary Figure S5
